Development 137, 359 (2010) doi:10.1242/dev.047597

## Regulation of lymphatic-blood vessel separation by endothelial Rac1

**Gabriela D'Amico, Dylan T. Jones, Emma Nye, Karen Sapienza, Antoine R. Ramjuan, Louise E. Reynolds, Stephen D. Robinson, Vassiliki Kostourou, Dolores Martinez, Deborah Aubyn, Richard Grose, Gareth J. Thomas, Bradley Spencer-Dene, Daniel Zicha, Derek Davies, Victor Tybulewicz and Kairbaan M. Hodivala-Dilke**

There was an error published in the supplementary material for *Development* **136**, 4043-4053.

In the legends for Figs S1, S2, S4, S5, S6 and S9,  $Rac^{fl/fl}$  was incorrectly stated as  $Rac^+$ .

In the title of Fig. S5, Vegfr3 was incorrectly stated as VR3.

The supplementary figure legends have now been corrected.

We apologise to authors and readers for this mistake.
